# Supplementary material
Source: MDPI journal article supplement (https://www.mdpi.com/1999-4907/8/10/379)
Supplement: s1 [file s1]

**Supplementary Material**

**Table S1.** Monthly change of climatic variables included the mean (*T*mean, oC), maximum (*T*max, oC), minimum (*T*min, oC) of air temperature, precipitation (*P*, mm), relative humidity (*RH*, %), sunshine duration (*S*d, hours), wind speed (*U*, m s-1) and pan evaporation (*E*p, mm) at Ejin station during the past 60 years (1957–2016).

| **Month** | ***T*mean** | ***T*max** | ***T*min** | ***P*** | ***RH*** | ***S*d** | ***U*** | ***E*p** |
| --- | --- | --- | --- | --- | --- | --- | --- | --- |
| **1** | -11.5 | -3.3 | -16.9 | 0.3 | 48.7 | 227 | 2.5 | 35.5 |
| **2** | -6.2 | 2.6 | -12.9 | 0.2 | 36.4 | 231 | 2.8 | 68.4 |
| **3** | 2.3 | 10.5 | -5.2 | 1.2 | 27.9 | 272 | 3.3 | 181.3 |
| **4** | 11.5 | 19.9 | 3.5 | 1.8 | 22.8 | 298 | 4.0 | 212.0 |
| **5** | 19.2 | 27.1 | 10.6 | 2.7 | 21.7 | 335 | 4.0 | 301.5 |
| **6** | 24.9 | 32.4 | 16.6 | 6.2 | 25.4 | 335 | 3.8 | 333.6 |
| **7** | 27.0 | 34.6 | 18.9 | 10.0 | 32.0 | 332 | 3.5 | 338.8 |
| **8** | 24.9 | 32.5 | 17.2 | 7.5 | 34.0 | 321 | 3.3 | 299.1 |
| **9** | 17.8 | 26.2 | 10.4 | 4.5 | 32.7 | 300 | 2.9 | 211.5 |
| **10** | 8.4 | 17.2 | 1.5 | 2.5 | 34.7 | 283 | 2.8 | 130.0 |
| **11** | -1.7 | 6.4 | -7.8 | 0.5 | 40.6 | 231 | 3.0 | 89.6 |
| **12** | -9.7 | -2.0 | -14.9 | 0.3 | 49.5 | 216 | 2.7 | 39.1 |
| **Mean or Sum** | 8.9 | 17.0 | -9.5 | 37.5 | 33.9 | 3382 | 3.2 | 2240.5 |
